# Supplementary material
Source: publisher site journal article supplement (https://www.dovepress.com/article/supplementary_file/619823/619823%20Supplementary%20material.docx)
Supplement: Supplementary file 1 [file 619823%20Supplementary%20material.docx]

**Supplementary Table S1. CARE-domain compliance matrix for included TNBC case reports**

Scoring key: Yes = adequately reported; Partial = reported but incomplete; NR = not reported or not clearly identifiable. Overall reporting completeness was interpreted qualitatively using CARE domains.

| **No.** | **Case report** | **Case focus** | **Title/keywords** | **Abstract/case uniqueness** | **Patient information** | **Diagnostic assessment** | **Therapeutic intervention** | **Follow-up/outcomes** | **Adverse events** | **Strengths/limitations** | **Take-away lesson** | **Overall completeness** |
| --- | --- | --- | --- | --- | --- | --- | --- | --- | --- | --- | --- | --- |
| 1 | Chen et al. (2025) | Metastatic metaplastic TNBC treated with immune checkpoint inhibitor plus chemotherapy | Yes | Yes | Yes | Yes | Yes | Yes | Yes | Yes | Yes | High |
| 2 | Al-Bitar et al. (2025) | Synchronous TNBC, rectal adenocarcinoma, and chemotherapy-induced HBV reactivation | Yes | Yes | Yes | Yes | Yes | Yes | Yes | Partial | Yes | High |
| 3 | Yu et al. (2024) | PD-1 inhibitor combined with SBRT, GM-CSF, and thymosin alpha-1 in metastatic TNBC | Yes | Yes | Yes | Yes | Yes | Yes | Yes | Yes | Yes | High |
| 4 | Pellegrino et al. (2024) | Atezolizumab-induced Sjogren syndrome in TNBC | Yes | Yes | Yes | Yes | Yes | Yes | Yes | Partial | Yes | High |
| 5 | Bao et al. (2024) | Pregnancy-associated TNBC treated with pregnancy termination and multimodal therapy | Yes | Yes | Yes | Yes | Yes | Yes | Partial | Partial | Yes | Moderate-to-high |
| 6 | Wang et al. (2022) | BRAF V600E-mutated TNBC treated with vemurafenib-based therapy | Yes | Yes | Yes | Yes | Yes | Yes | Yes | Partial | Yes | High |
| 7 | Feng et al. (2021) | Hyperprogressive disease after pembrolizumab followed by response to atezolizumab | Yes | Yes | Yes | Yes | Yes | Yes | Yes | Yes | Yes | High |
| 8 | Tan et al. (2025) | Hepatic sarcoidosis-like reaction during neoadjuvant pembrolizumab | Yes | Yes | Partial | Yes | Yes | Yes | Yes | Partial | Yes | Moderate-to-high |
| 9 | Farhat et al. (2025) | Metaplastic TNBC regression after neoadjuvant chemotherapy and surgery | Yes | Yes | Yes | Yes | Yes | Yes | Partial | Partial | Yes | Moderate-to-high |
| 10 | Nahhat et al. (2024) | Metaplastic breast cancer with axillary presentation and complete response | Yes | Yes | Yes | Yes | Yes | Yes | NR | Yes | Yes | Moderate-to-high |
| 11 | Jinadasa et al. (2024) | Triple-negative pleomorphic lobular carcinoma in a BRCA1 carrier | Yes | Yes | Yes | Yes | Partial | Yes | NR | Yes | Yes | Moderate-to-high |
| 12 | Gurbuz et al. (2024) | Fatal myelodysplastic syndrome after chemoradiotherapy in Bloom syndrome | Yes | Yes | Yes | Yes | Yes | Yes | Yes | Yes | Yes | High |
| 13 | Ge et al. (2024) | Acinic cell carcinoma of the breast with low- and high-grade triple-negative components | Yes | Yes | Yes | Yes | Yes | Yes | NR | Partial | Yes | Moderate-to-high |
| 14 | Martorana et al. (2023) | LAR-positive TNBC with receptor conversion and molecularly characterized recurrence | Yes | Yes | Yes | Yes | Yes | Yes | Partial | Partial | Yes | Moderate-to-high |
| 15 | Jacover et al. (2023) | Refractory BRCA1-positive TNBC treated with adoptive TIL therapy and IL-2 | Yes | Yes | Yes | Yes | Yes | Yes | Yes | Yes | Yes | High |
| 16 | del Giglio et al. (2023) | TNBC with BRCA2 reversion mutation during olaparib-controlled lung adenocarcinoma | Yes | Yes | Yes | Yes | Yes | Partial | Partial | Partial | Yes | Moderate-to-high |
| 17 | Wang et al. (2022) | Metastatic TNBC with BRCA/HRD alterations and durable response to olaparib | Yes | Yes | Yes | Yes | Yes | Yes | Yes | Partial | Yes | High |
| 18 | Singh et al. (2022) | Metastatic TNBC reclassified as secretory breast carcinoma after ETV6-NTRK3 detection | Yes | Yes | Yes | Yes | Yes | Yes | NR | Yes | Yes | Moderate-to-high |
| 19 | Saranti et al. (2022) | Ureteral metastasis from TNBC causing obstructive uropathy and hematuria | Yes | Yes | Yes | Yes | Yes | Yes | Partial | Partial | Yes | Moderate-to-high |
| 20 | Nel et al. (2022) | Discordance between pCR and residual molecular disease markers by DTC/ctDNA analysis | Yes | Yes | Yes | Yes | Yes | Yes | Yes | Yes | Yes | High |
| 21 | Kharel et al. (2022) | Stage IIIC inflammatory TNBC treated with pembrolizumab plus chemotherapy | Yes | Yes | Yes | Yes | Yes | Yes | Yes | Partial | Yes | High |
| 22 | Kawaguchi et al. (2022) | Bilateral inflammatory breast cancer after treatment for early-stage TNBC | Yes | Yes | Yes | Yes | Yes | Yes | NR | Partial | Yes | Moderate-to-high |
| 23 | Foulser et al. (2022) | Atezolizumab-associated posterior reversible encephalopathy syndrome | Yes | Yes | Yes | Yes | Yes | Yes | Yes | Partial | Yes | High |
| 24 | Bellon et al. (2020) | Virtual tumor-board case on sequencing surgery, axillary management, and radiation in node-positive TNBC | Partial | Partial | Yes | Yes | Yes | Partial | Partial | Partial | Yes | Moderate |

Note: NR in the adverse-events column indicates that the adverse-event reporting domain was not clearly identifiable as a CARE item; it does not necessarily indicate that no adverse event occurred.
